# Supplementary material for: Iron-dependent histone 3 lysine 9 demethylation controls B cell proliferation and humoral immune responses
Source: PubMed Central journal article supplement (PMC6610088; doi:10.1038/s41467-019-11002-5), 2019-07-03
Supplement: 41467_2019_11002_MOESM1_ESM.pdf [file 41467_2019_11002_MOESM1_ESM.pdf]

## **Supplementary Information**

### **Iron-dependent histone 3 lysine 9 demethylation controls B cell proliferation and humoral immune responses**

Jiang, et al.

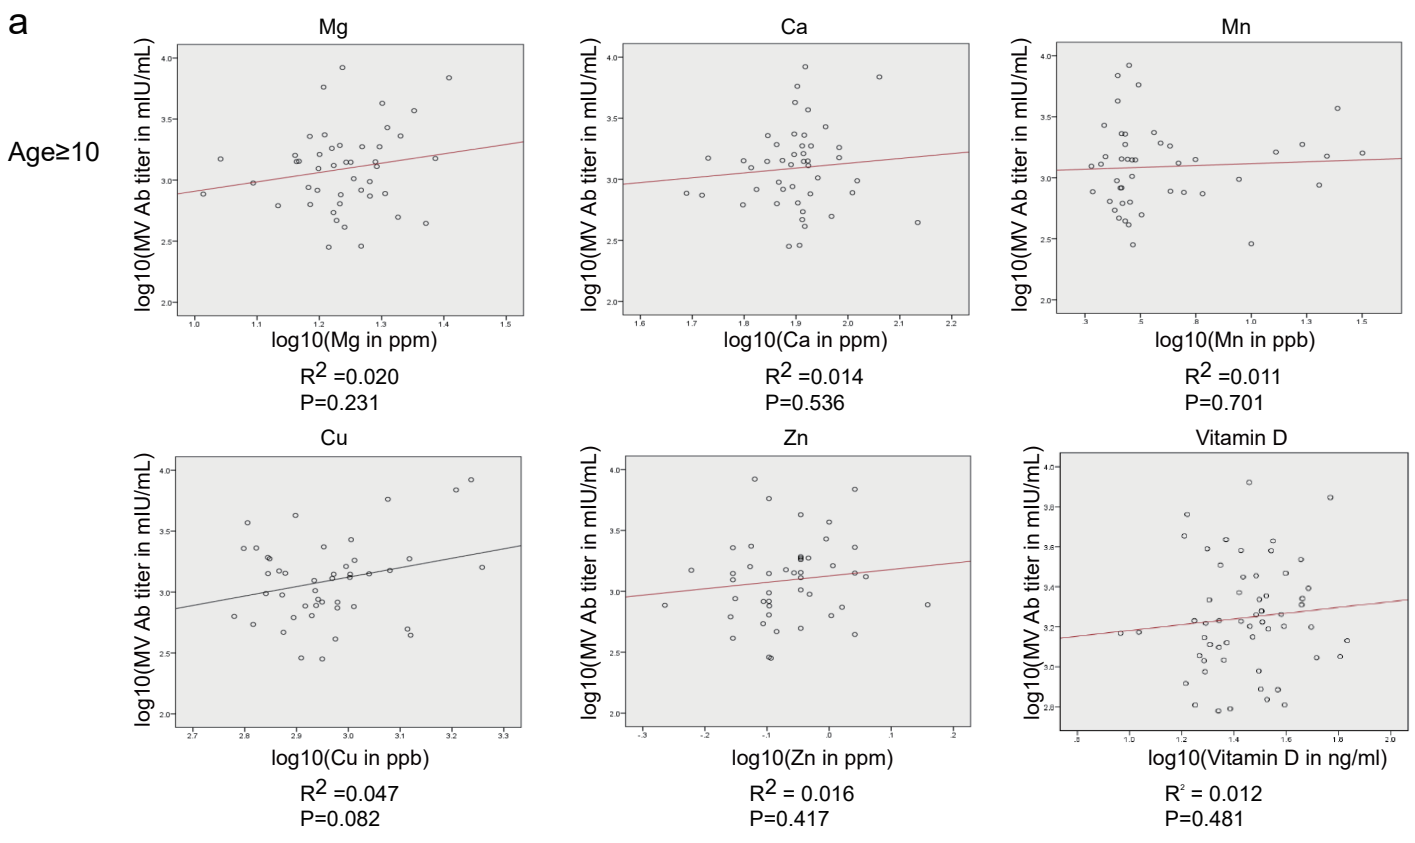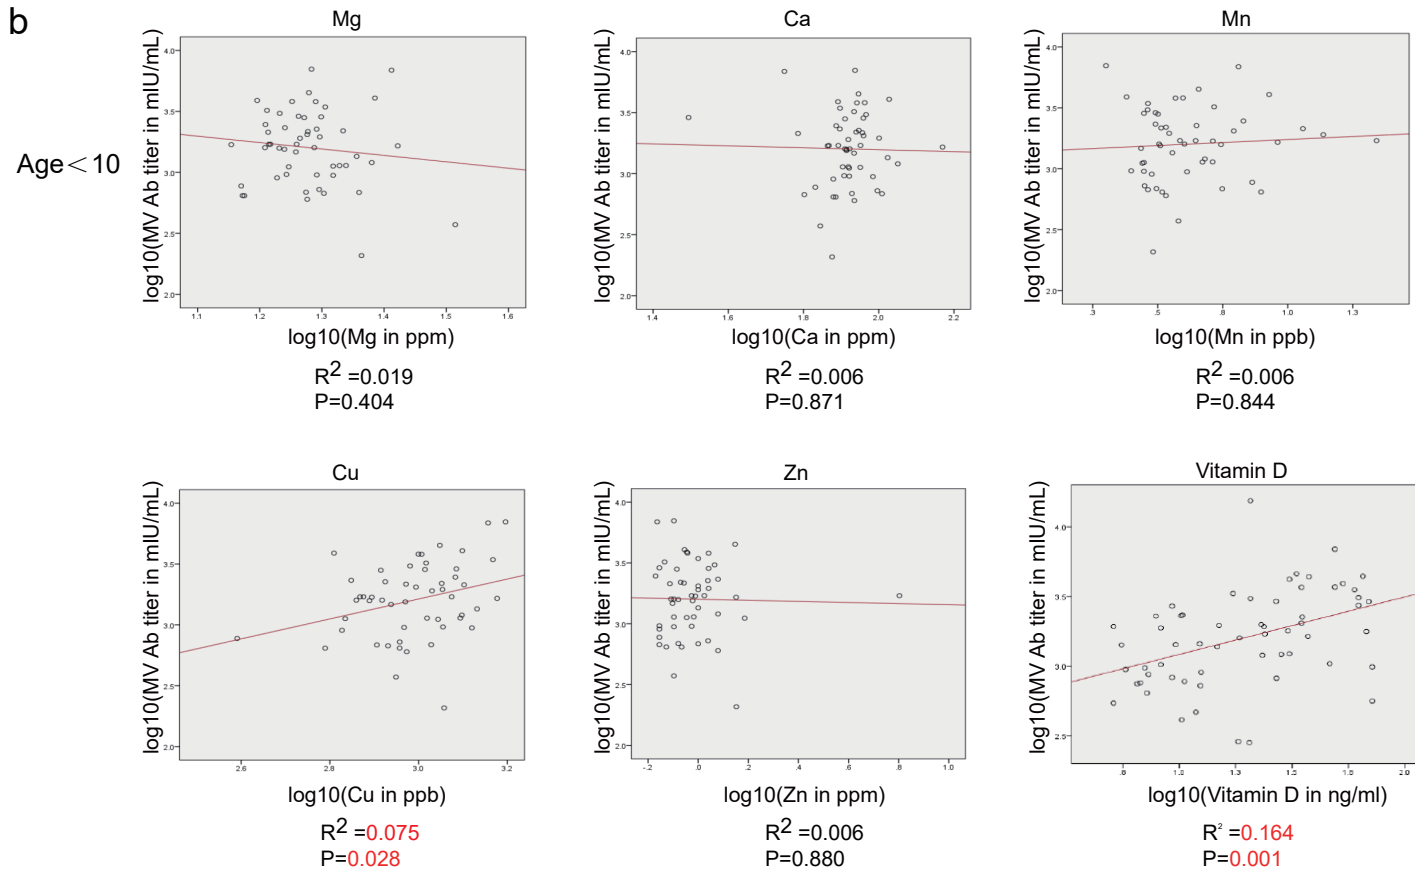

Supplementary Figure 1. Involvement of other trace elements and vitamin D in humoral immune response. (a and b) A linear regression model was used to analyze the relationship between trace elements (Magnesium, calcium, manganese, copper, zinc) and MV-specific antibody titers, between vitamin D and MV-specific antibody titers in age  $\geq 10$  human subjects (a) and age  $< 10$  subjects. (b) Trace elements were checked by ICP-MS, and vitamin D was checked by ELISA. Pearson's correlation test was used to determine the correlation coefficient  $r$ .  $P < 0.05$  was considered significant ( $*P < 0.05$ ,  $**P < 0.01$ ).

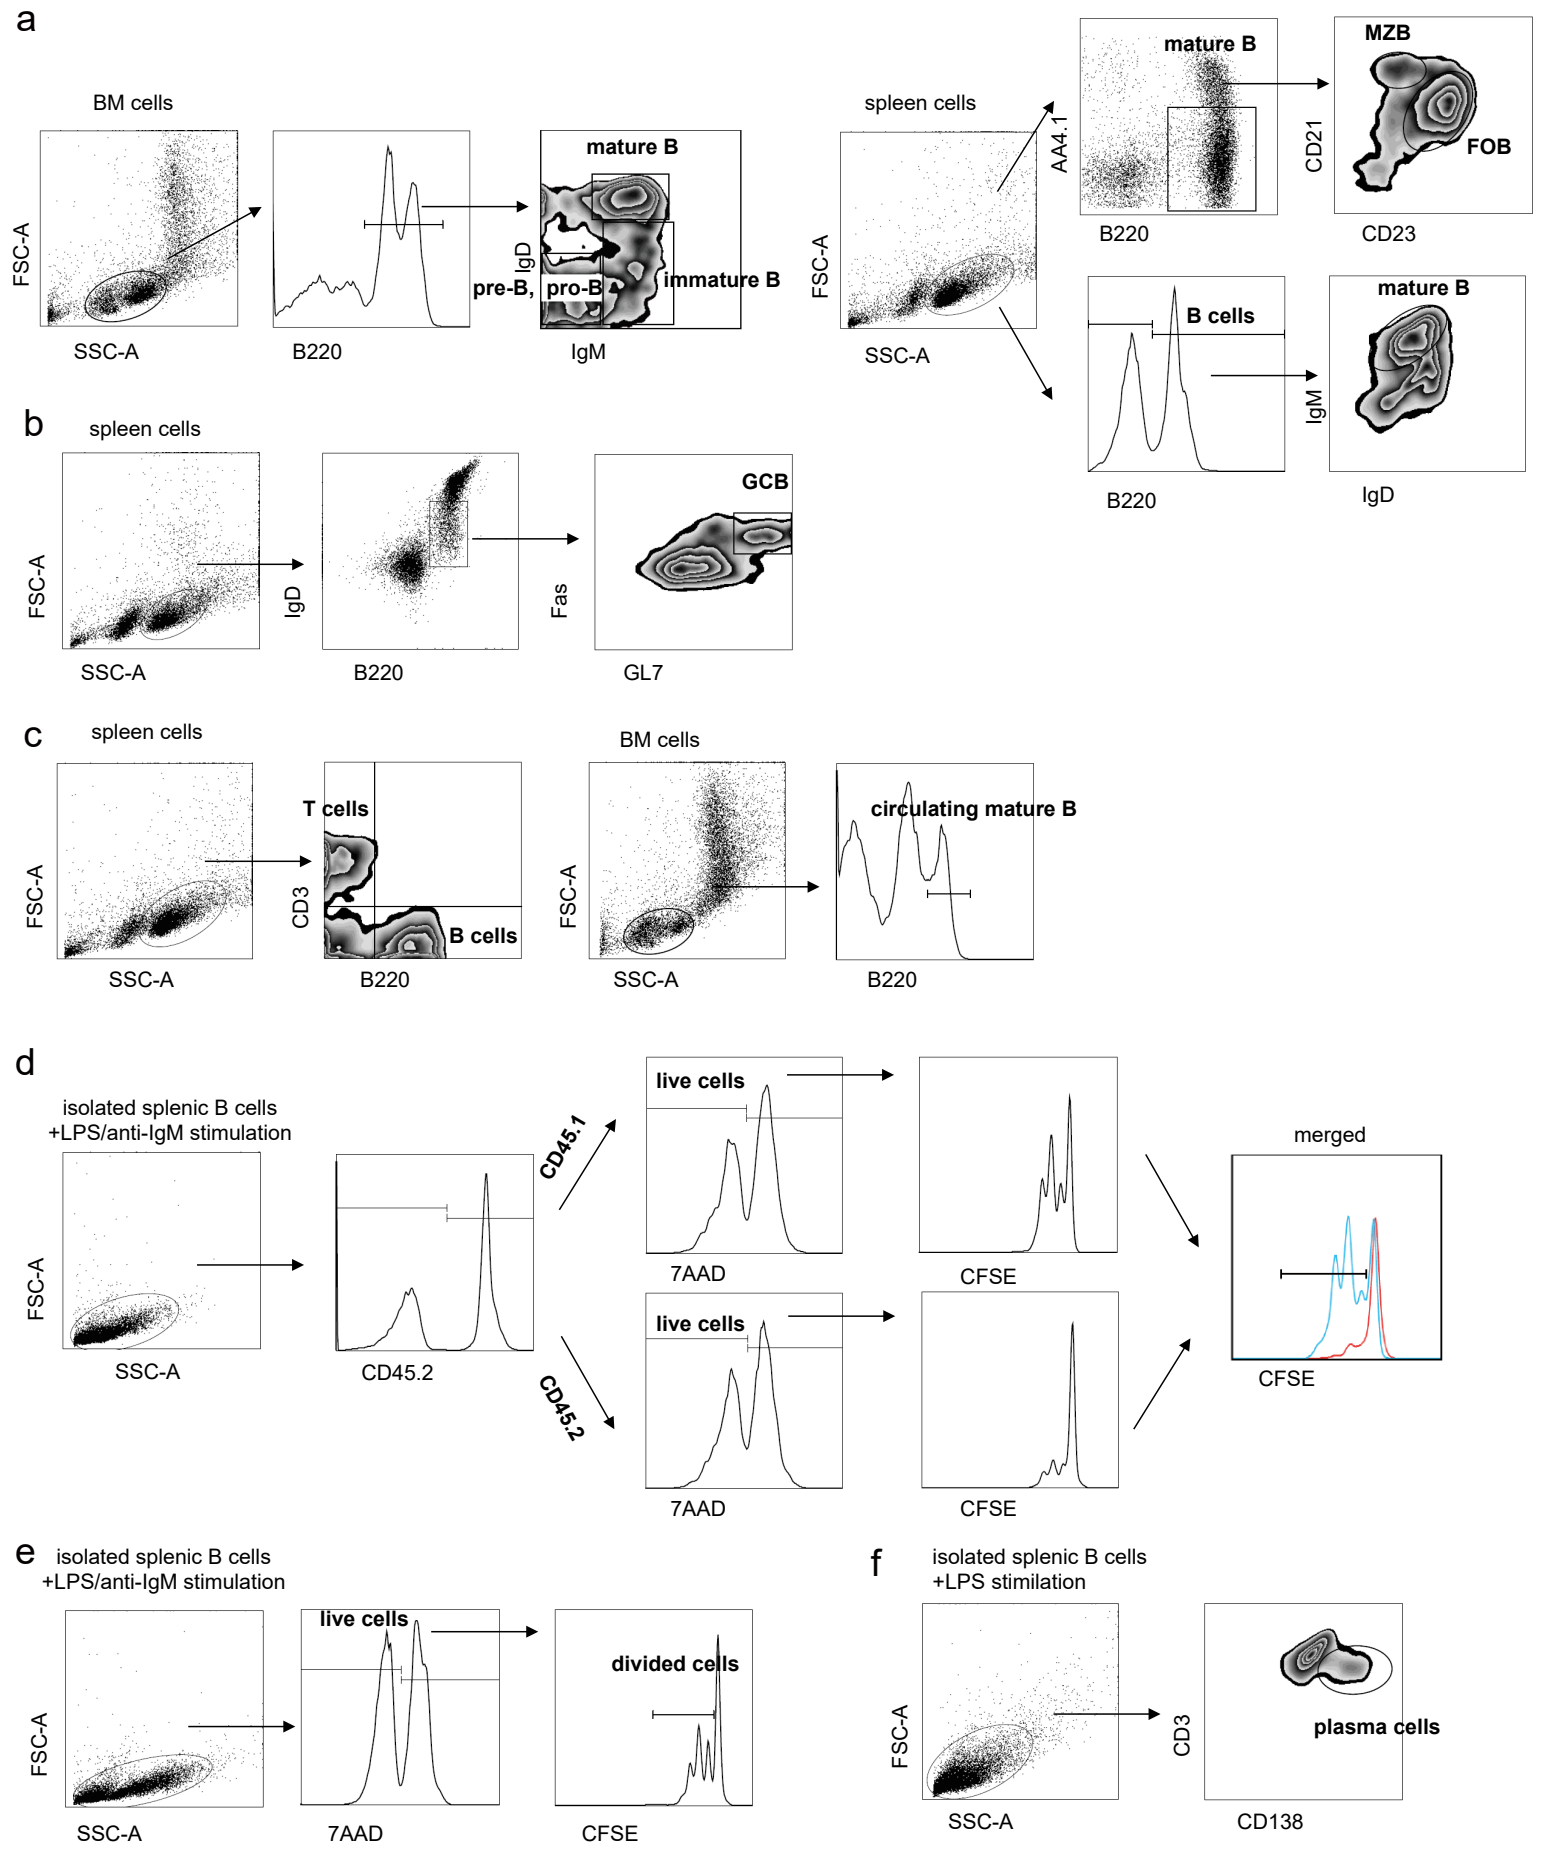

Supplementary Figure 2. Gating strategies used for cell sorting. (a) Gating strategy of mature B cells (B220+IgM+IgDhi) in bone marrow, MZB (B220+AA4.1-CD21hiCD23int) and FOB (B220+AA4.1-CD21intCD23hi) differentiation in spleen, as presented on Fig. 2a,b. (b) Gating strategy of germinal center B cells (B220+IgDlowFas+GL7+) from wildtype and iron-deficient mice immunized with antigens, as presented on Fig. 2f, g. (c) Gating strategy of B cells and circulating B cells in bone marrow, as presented on Fig. 3a and supplementary Fig. 4. (d) Gating strategy to assess B cell proliferation (divided cells) of isolated B cells from co-transfer mice, as presented on Fig. 3e-h. (e) Gating strategy to assess B cell proliferation of isolated B cells from wildtype C57BL/6 mice. The same strategy was used for the in vitro proliferation assay presented on Fig. 4c, 5c-d, 7a and 8d. (f) Gating strategy of plasma cells for in vitro cultures presented on Fig. 4e.

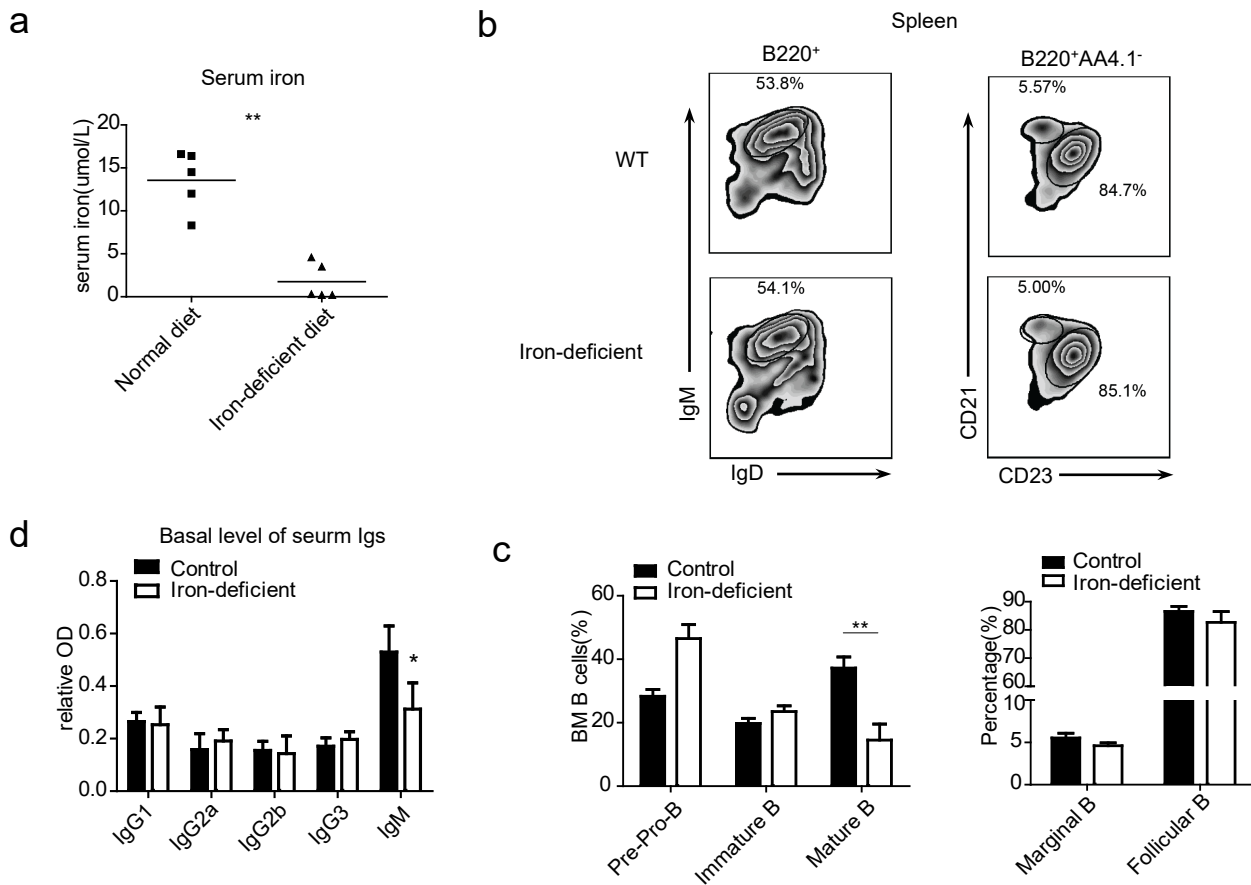

Supplementary Figure 3. Iron-deficient mouse model. (a) Serum iron levels in the peripheral blood serum of mice that were fed a control diet or an iron-deficient diet for 5 weeks. (b) Flow cytometry of splenocytes from control and iron-deficient mice. The splenocytes were stained with anti-B220 to identify B cells and further stained with anti-IgM and anti-IgD to assess B cell maturation. Evaluation of MZB cells and FOB cells was followed by staining with anti-AA4.1, anti-CD21 and anti-CD23 antibodies. (c) Statistics for the percentage of B cell subsets in the two groups (mean  $\pm$  SEM of three mice per group). (d) Results of ELISA to test basal levels of different serum Ig isotypes (mean  $\pm$  SEM of four mice per group). \*P < 0.05, \*\*P < 0.01, Student's t test.

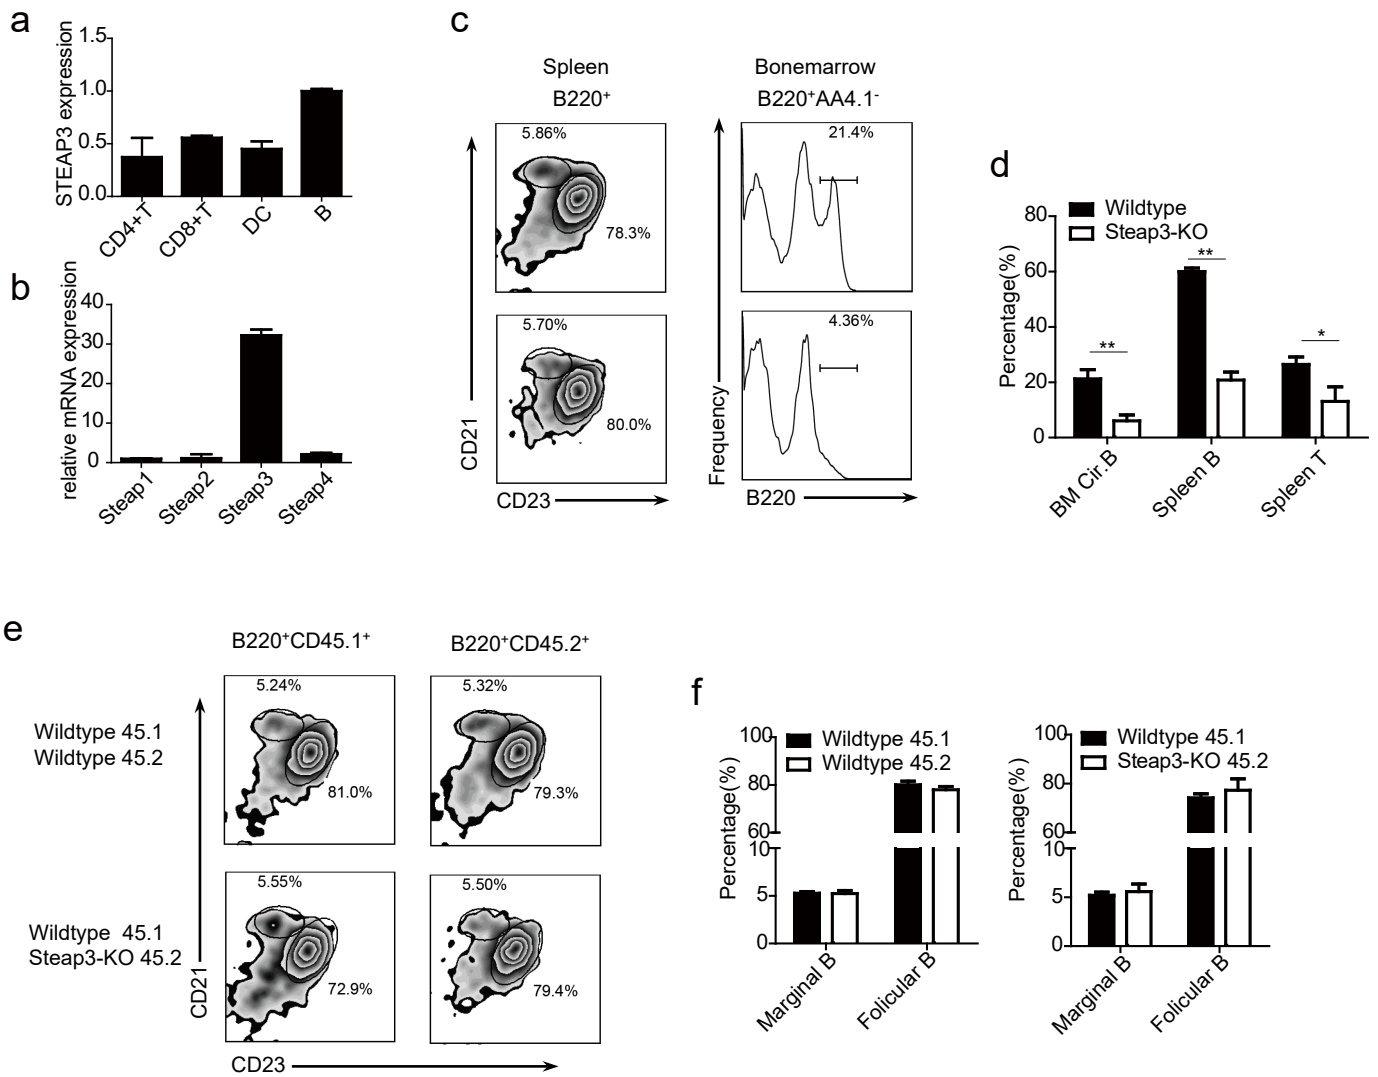

Supplementary Figure 4. High STEAP3 expression in B cells and B cell differentiation in Steap3-KO mice.

(a) STEAP3 expression in primary CD4<sup>+</sup> T cells, CD8<sup>+</sup> T cells, dendritic cells and B cells purified from the spleens of wild-type C57BL/6J mice (males, 8 weeks old). The expression levels were normalized to GAPDH expression, and the expression level of STEAP3 in primary B cells was set as 1. (b) Relative mRNA expression levels of STEAP1, STEAP2, STEAP3 and STEAP4 in splenic B cells. (c) Evaluation of MZB cells (B220+AA4.1-CD21<sup>hi</sup>CD23<sup>int</sup>) and FOB cells (B220+AA4.1-CD21<sup>int</sup>CD23<sup>hi</sup>) in the spleen (c, left). Identification of mature circulating B cells (B220<sup>hi</sup>) in bone marrow (c, right). (d) Statistics for the percentage of mature circulating B cells in bone marrow and the percentage of splenic B and T cells in the two groups (mean ± SEM of three mice per group). (e) Flow cytometry of splenocytes from recipient mice was conducted to compare CD45.1<sup>+</sup> wild-type B cells with CD45.2<sup>+</sup> wild-type or Steap3-KO B cells. The splenocytes were further stained with anti-CD21 and anti-CD23 antibodies to evaluate MZB cells and FOB cells. (f) Statistics for the percentage of CD45.1<sup>+</sup> or CD45.2<sup>+</sup> MZB cells and FOB cells in the spleens of different recipient mice (mean ± SEM of three mice per group). \*P < 0.05, \*\*P < 0.01, Student's t test.

**a**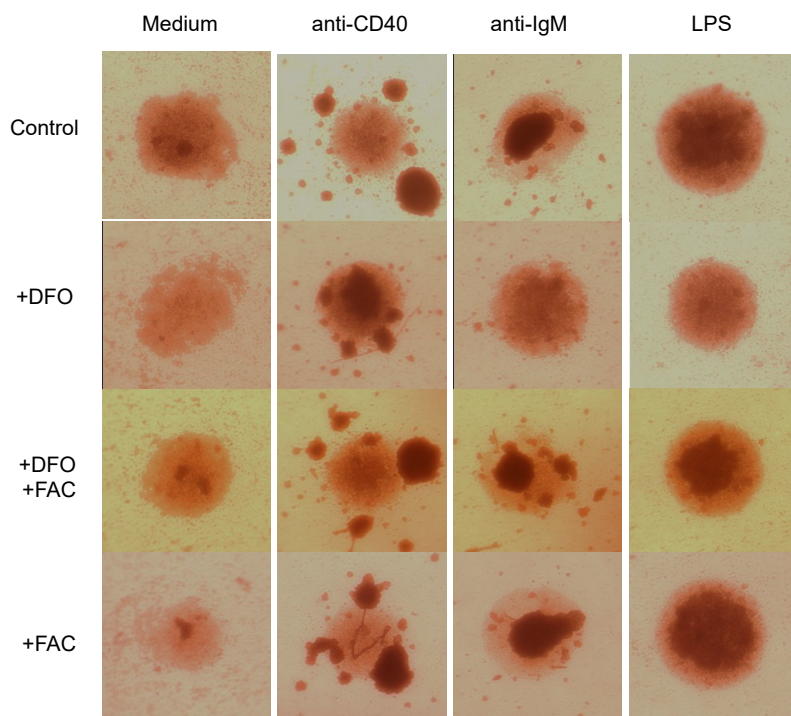**b**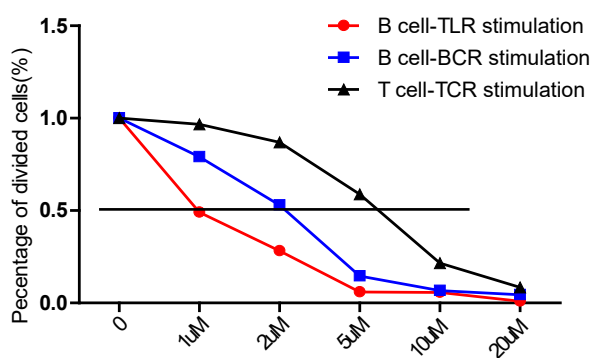**c**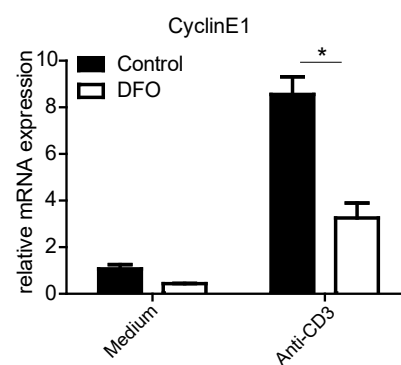

Supplementary Figure 5. Impaired B and T Cell proliferation under iron-deficient conditions in response to various stimulations. (a) Clonal expansion of B cells that were unstimulated or stimulated with anti-CD40 (1  $\mu\text{g/ml}$ ), anti-IgM (10  $\mu\text{g/ml}$ ) or LPS (2  $\mu\text{g/ml}$ ) for 48 h in the presence of DFO (20  $\mu\text{M}$ ), DFO and FAC (100  $\mu\text{M}$ ) or FAC (100  $\mu\text{M}$ ) alone in normal medium. Images were acquired using an Axio Observer.A1 microscope (Zeiss). (b) Splenic B cells were stimulated with anti-IgM (BCRs, 10  $\mu\text{g/ml}$ ) or LPS (TLRs, 2  $\mu\text{g/ml}$ ), and T cells were stimulated with anti-CD3 (TCRs, 1  $\mu\text{g/ml}$ ) in the presence of different concentrations of DFO. Proliferation was assessed by CFSE dilution 72 h later, and the percentage of divided cells in the absence of DFO was set as 1. (c) Cyclin E1 induction were measured by qRT-PCR in control and iron-deficient T cells (20uM DFO) that were unstimulated or stimulated with anti-CD3 (1  $\mu\text{g/ml}$ ). Data were representative of two independent experiments. \*P < 0.05, \*\*P < 0.01, Student's t test.

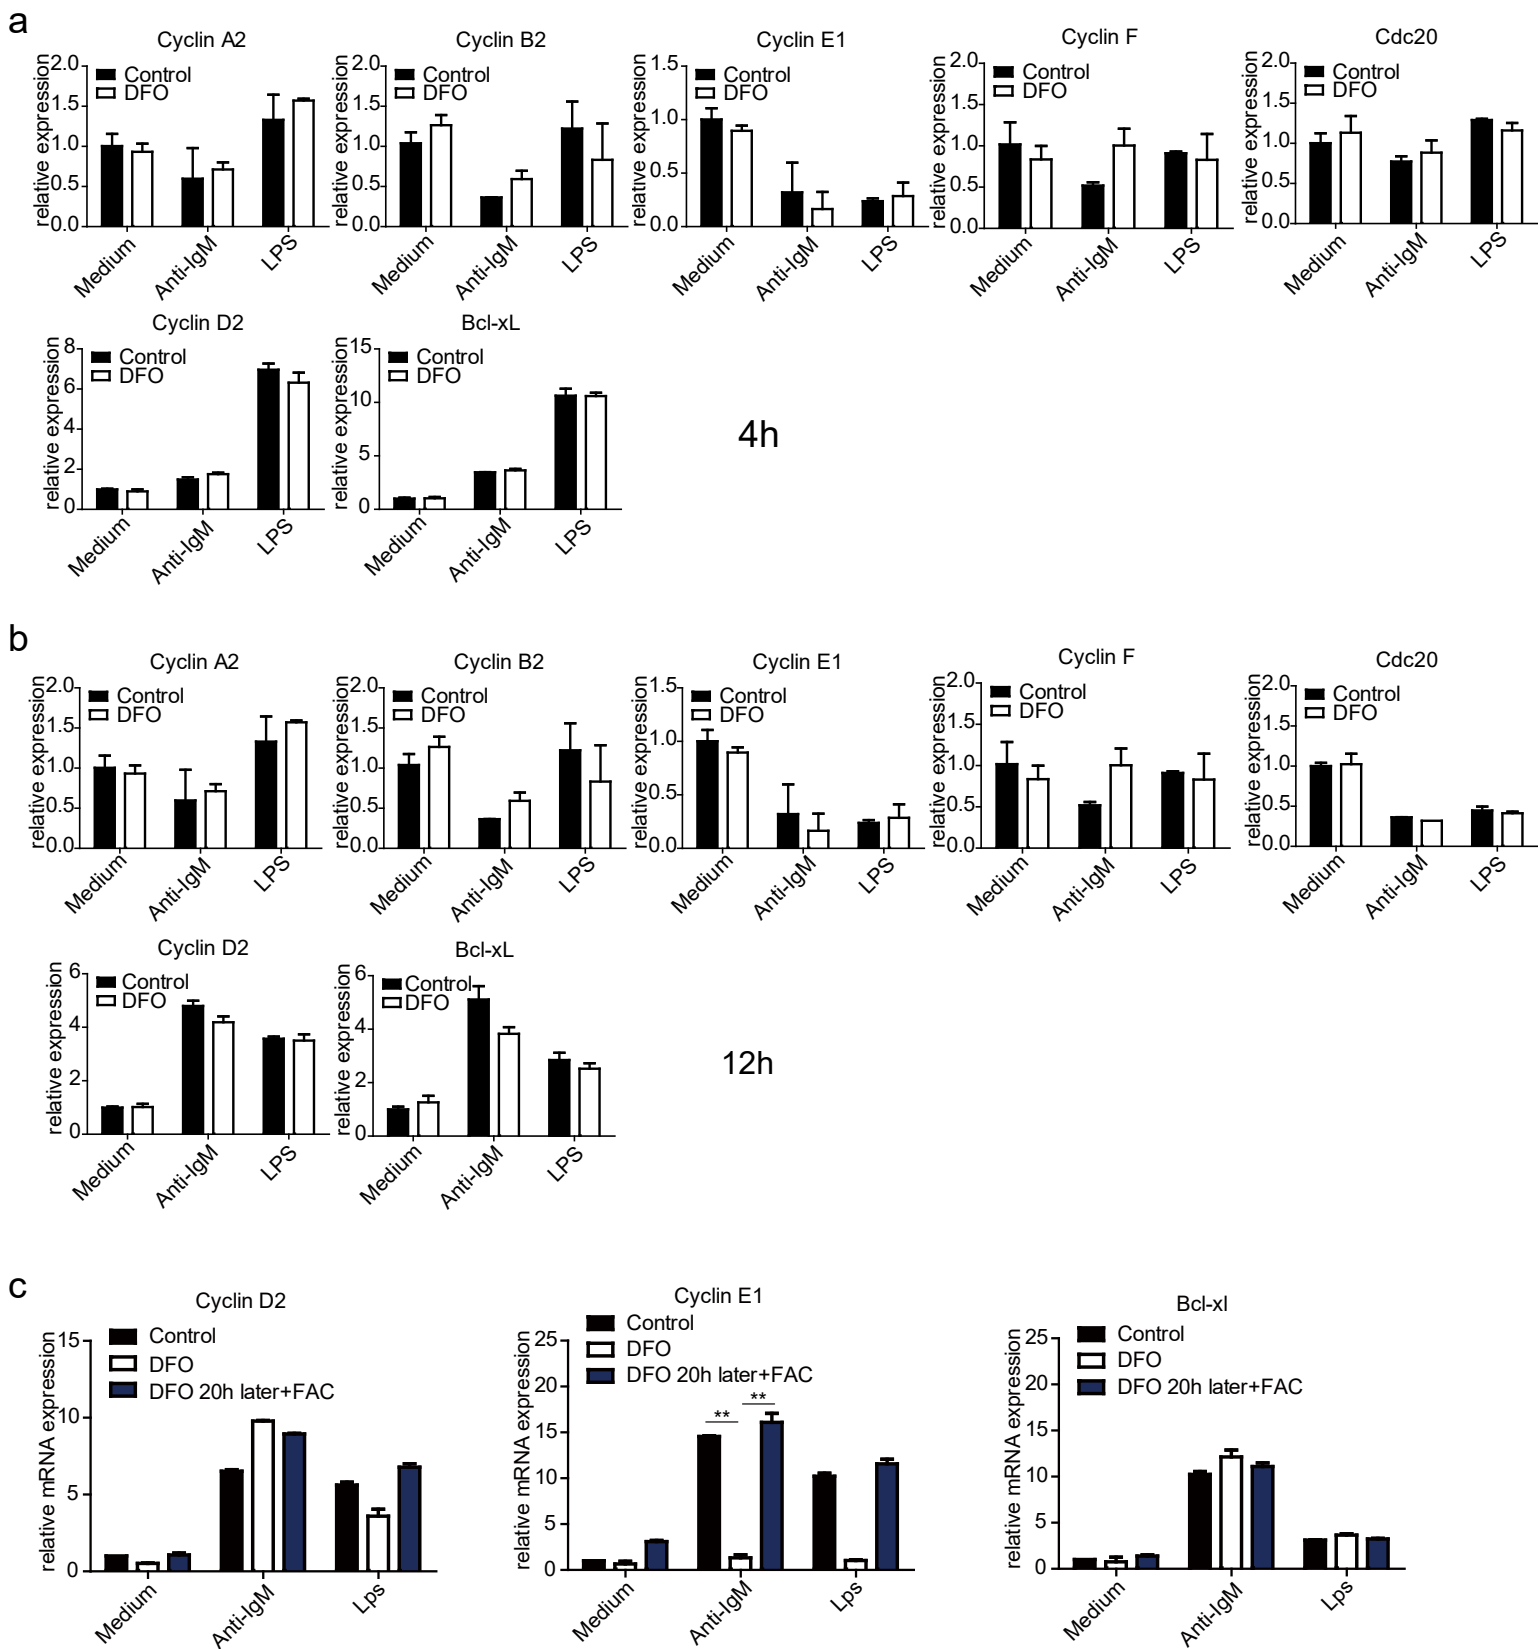

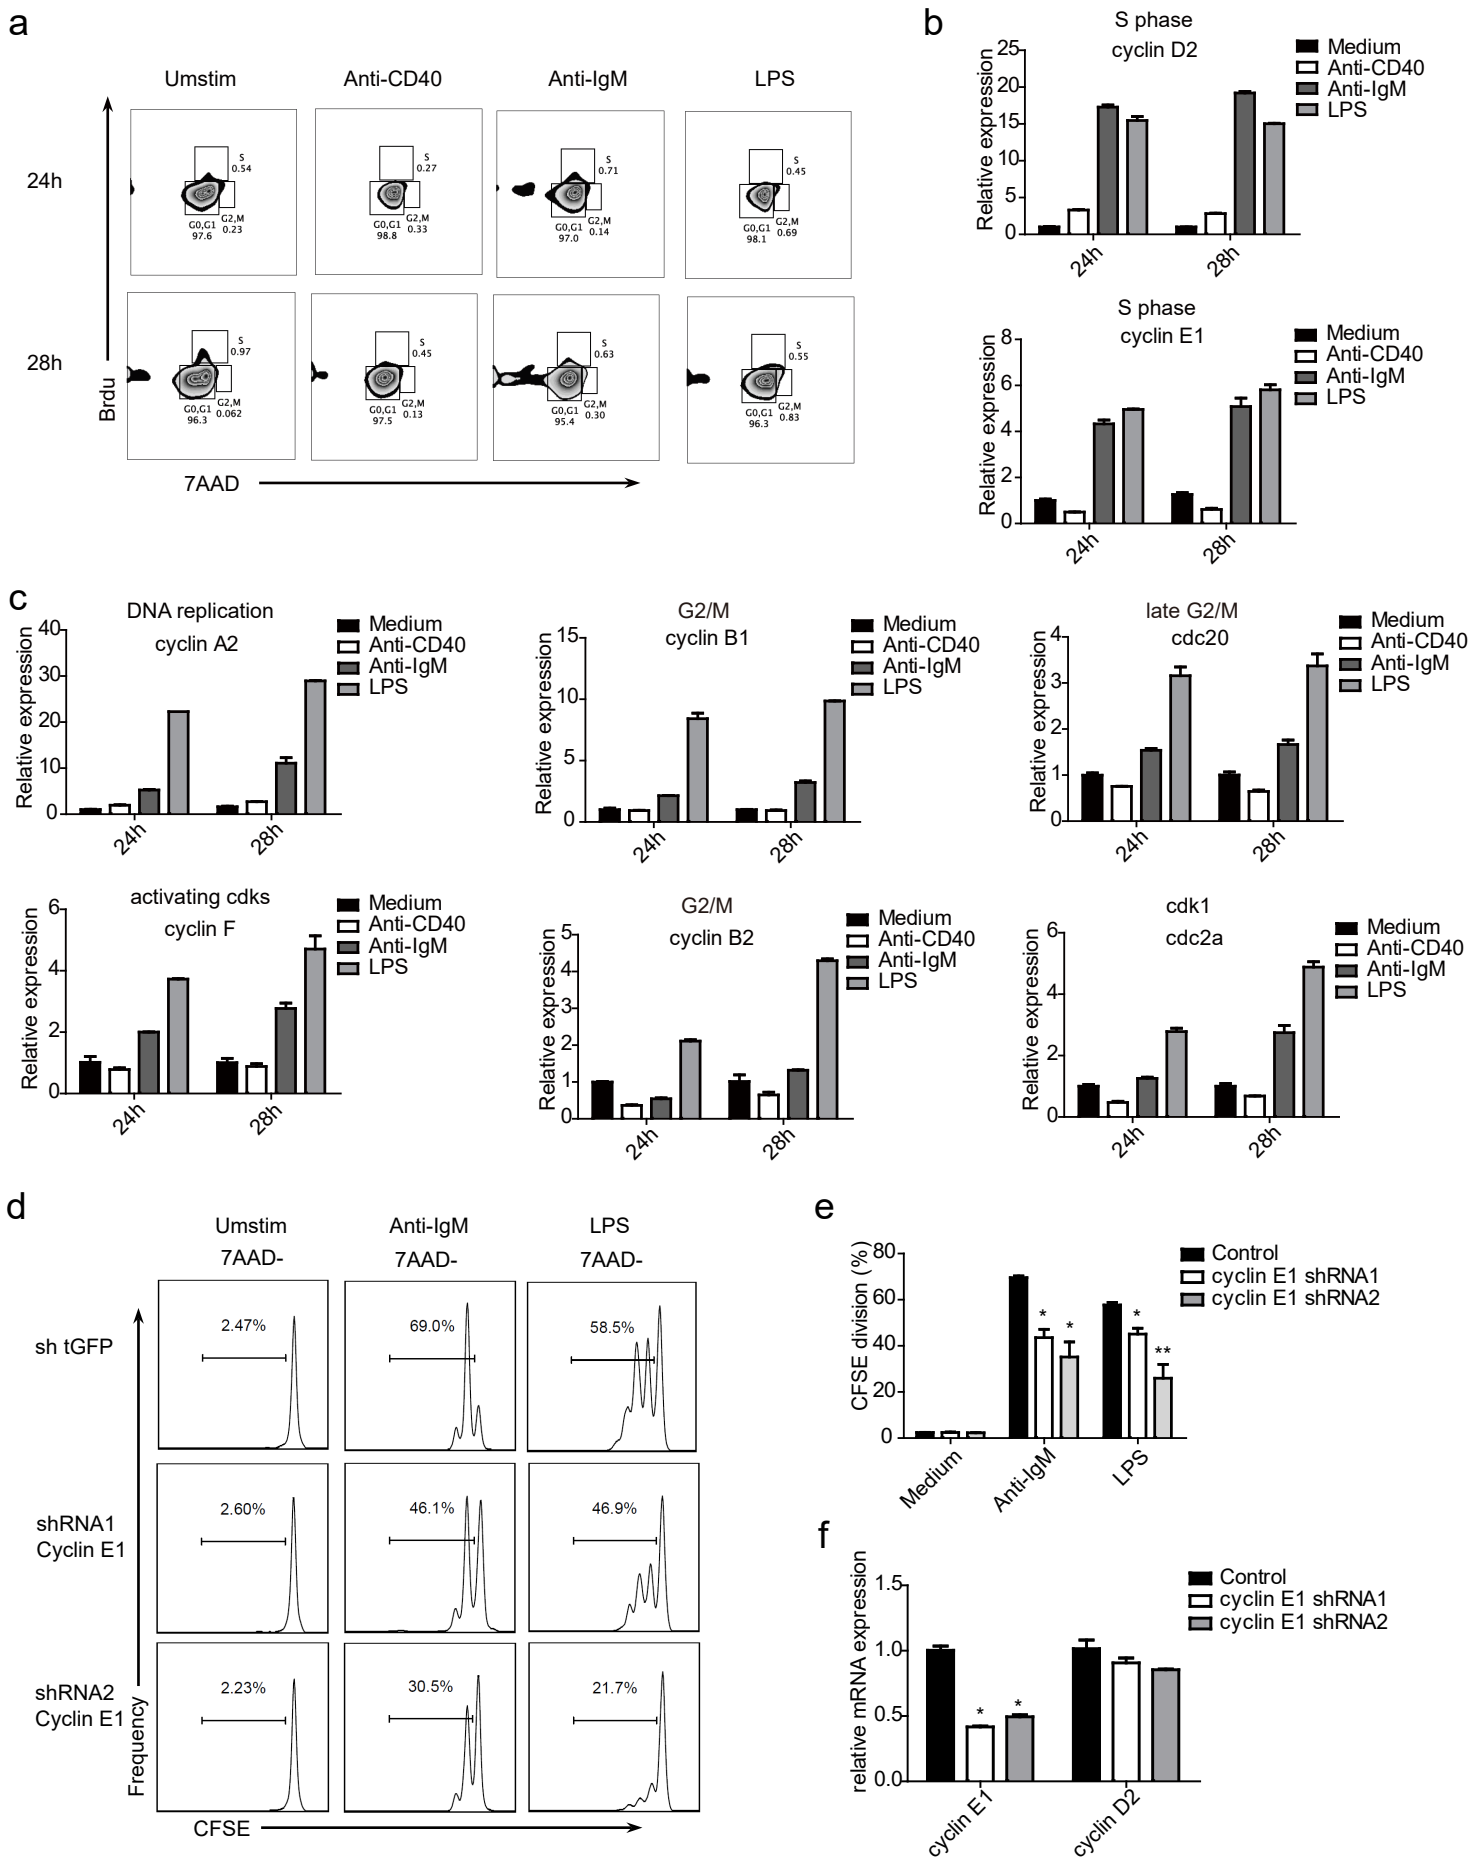

Supplementary Figure 7. Cyclin E1 and cyclin D2 induction occur prior to DNA replication in activated B cells. (a) Naive B cells were stimulated with anti-CD40 (1  $\mu$ g/ml), anti-IgM (10  $\mu$ g/ml) or LPS (2  $\mu$ g/ml) for 24 or 28 h, cocultured with 10  $\mu$ M BrdU for the last 45 min, stained with anti-BrdU and 7AAD, and analyzed by flow cytometry. (b and c) Induction of different cell cycle-related genes at 24 h and 28 h post stimulation. (d) CFSE-labeled splenic B cells from wild-type C57BL/6 mice were infected with cyclin E1 shRNA (two independent sequences) lentivirus, and cell proliferation was analyzed by flow cytometry following anti-IgM (10  $\mu$ g/ml) or LPS (2  $\mu$ g/ml) stimulation for 72 h. (e) Statistics for the percentage of B cells that underwent cell division after shRNA-mediated cyclin E1 knockdown. (f) Cyclin E1 and cyclin D2 mRNA expression in cyclin E1 shRNA lentivirus-infected B cells. \* $P$  < 0.05, \*\* $P$  < 0.01, Student's *t* test.



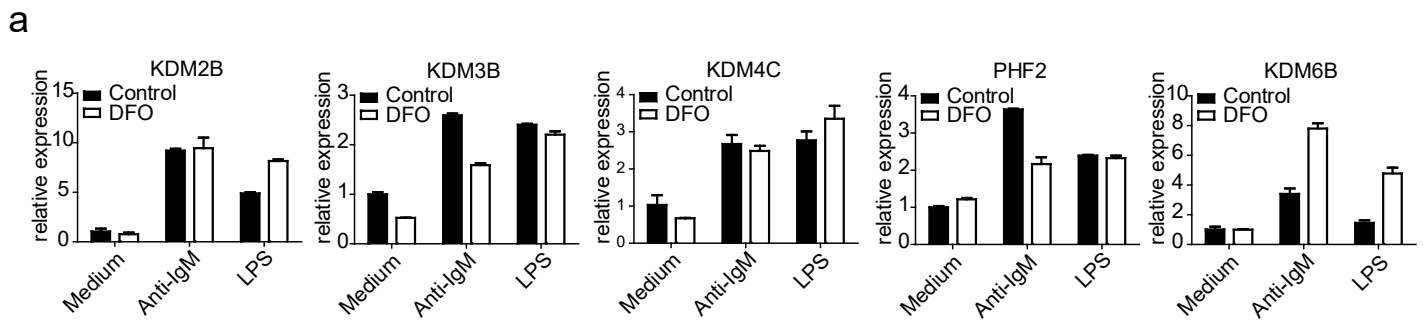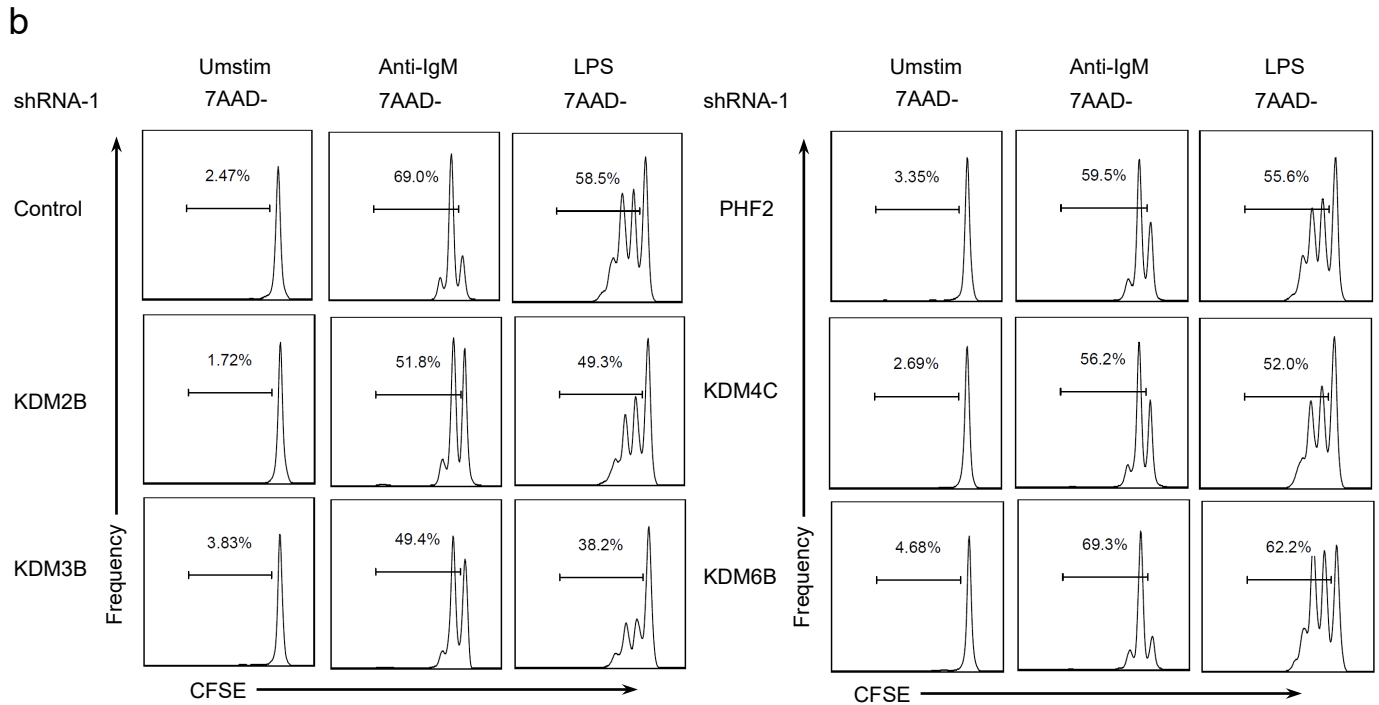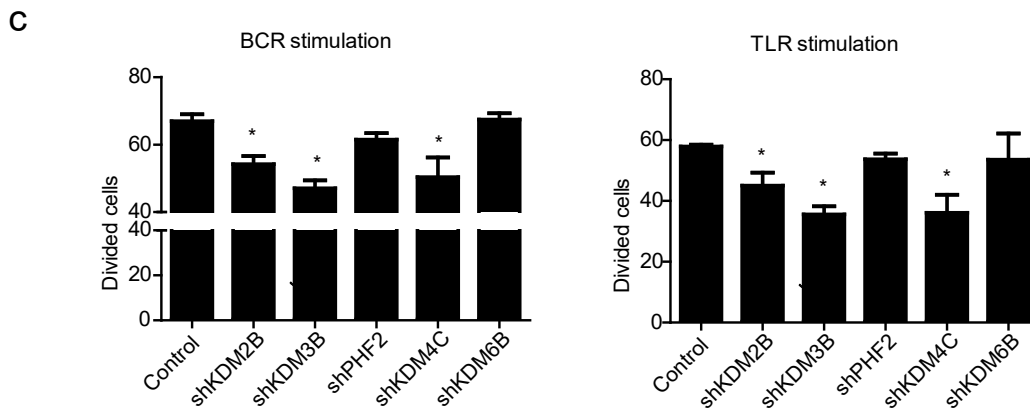

Supplementary Figure 8. KDM2B, KDM3B and KDM4C contribute to B cell proliferation to varying degrees. (a) qRT-PCR analysis of JmJc demethylase in control and iron-deficient B cells following BCR or LPS stimulation. The 5 JmJc demethylases induced after 48 h are shown. (b) CFSE-labeled splenic B cells from wild-type C57BL/6 mice were infected with shRNA lentiviruses targeting 5 different JmJc demethylases, and cell proliferation was analyzed by flow cytometry after stimulation with anti-IgM (10  $\mu$ g/ml) or LPS (2  $\mu$ g/ml) for 72 h. (c) Statistics for the percentage of B cells that underwent cell division under various conditions after shRNA-mediated knockdown of different JmJc demethylases. The data were representative of two independent experiments using two different shRNA target sequences. \*P < 0.05, \*\*P < 0.01, Student's t test.

**Supplementary table 1. shRNA sequences targeting cyclin E1**

|                  |               |                                                                           |
|------------------|---------------|---------------------------------------------------------------------------|
| Cyclin E1 shRNA1 | Top strand    | gatcc <b>GGAGGATCATGTTAAACAAAGTTCAAGAGACTTTGTTTAACATGATCCTCCTTTTTTg</b>   |
|                  | Bottom strand | aattc <b>AAAAAAGGAGGATCATGTTAAACAAAGTTCTCTTGAACTTTGTTTAAACATGATCCTCCg</b> |
| Cyclin E1 shRNA2 | Top strand    | gatcc <b>GCTTCTGCTTTGTATCATTCTTCAAGAGAGAAATGATACAAAGCAGAAGCTTTTTTg</b>    |
|                  | Bottom strand | aattc <b>AAAAAAGCTTCTGCTTTGTATCATTCTCTCTTGAAGAAATGATACAAAGCAGAAGCg</b>    |
| Control shRNA    | Top strand    | gatcc <b>GAAACCATGCAAAGTAAGGTTTTCAAGAGAAACCTTACTTTGCATGGTTTTCTTTTTTg</b>  |
|                  | Bottom strand | aattc <b>AAAAAAGAAACCATGCAAAGTAAGGTTTCTCTTGAAAACCTTACTTTGCATGGTTTCg</b>   |

Annealed top and bottom strands were inserted into pLVX-shRNA1 plasmid, EcoRI and BamHI were used as restriction enzymes.

**Supplementary table 2. sequences of the RT-qPCR and ChIP-qPCR primers**

| Real-time qPCR primer |                       |
|-----------------------|-----------------------|
| Ccnf-F                | TCAGGTTCTGTGGAGAAGGC  |
| Ccnf-R                | TTCTGTTGGGGACATCCTTG  |
| Ccnb2-F               | CTTGCAGAGCAGAGCATCAG  |
| Ccnb2-R               | TGAAACCAGTGCAGATGGAG  |
| Ccne1-F               | TCCACGCATGCTGAATTATC  |
| Ccne1-R               | CTCCAGAAAAAGGAAGGCAA  |
| Ccnd2-F               | GAGTGGGAACTGGTAGTGTTG |
| Ccnd2-R               | CGCACAGAGCGATGAAGGT   |
| Cdc20-F               | TTGGCCATGGTTGGATACTT  |
| Cdc20-R               | GAGTGCTGTGGATGTGCATT  |
| Ccna2-F               | GTGGTGATTCAAAACTGCCA  |
| Ccna2-R               | GGCCAGCTGAGCTTAAAGAA  |
| Bcl2l1-F              | CTGCATTGTTCCCGTAGAGA  |
| Bcl2l1-R              | GGTGAGTCGGATTGCAAGTT  |
| GAPDH-F               | CTAAGGCCAACCGTGAAA    |
| GAPDH-R               | AGAAGGAAGGCTGGAAA     |
